# Supplementary material for: An alternative NURF complex sustains acute myeloid leukemia by regulating the accessibility of insulator regions
Source: PubMed Central journal article supplement — EMBO J. 2023 Nov 21;42(24):e114221. doi: 10.15252/embj.2023114221 (PMC10711654; doi:10.15252/embj.2023114221), 2023-11-21
Supplement: EMBJ-42-e114221-s008.pdf [file EMBJ-42-e114221-s008.pdf]

## **Appendix Figures Table of Contents**

Appendix Figure S1. BPTF and SMARCA5 are essential for maintaining AML in vivo (page 2).

Appendix Figure S2. BPTF and SMARCA5 bind to active promoters in U937 and OCI-AML2 cells (page 3).

Appendix Figure S3. BPTF and SMARCA5 together remodel insulator regions in AML cells (page 4).

## Appendix Figure S1

A

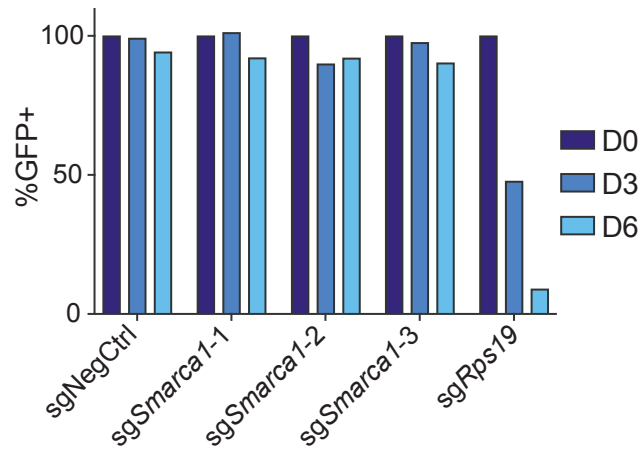

B

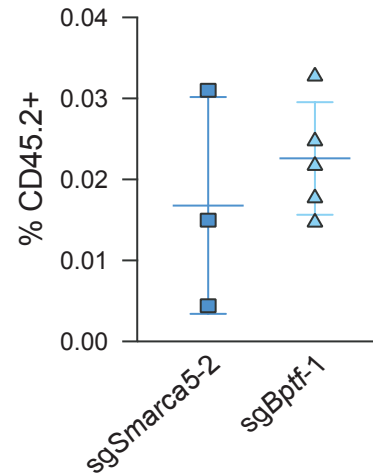

**Appendix Figure S1. BPTF and SMARCA5 are essential for maintaining AML in vivo.** A) Competition assay after *Smarca1* KO in mouse MLL-AF9 cells with inducible wtCas9 expression. The cells were transduced with the lentiviral cassettes expressing the corresponding sgRNAs and GFP and mixed with untransduced cells. The percentage of GFP-positive cells was measured over time. The data were normalized to Day 0. The results were validated in human AML cells, see Source data. B) Percentages of CD45.2+ (donor) cells present in the blood of the 8 surviving mice before experiment termination. Data are shown as mean  $\pm$ SD.

## Appendix Figure S2

A

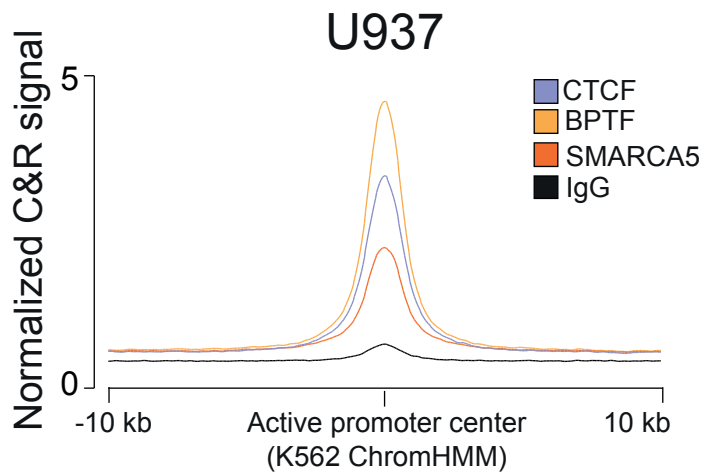

B

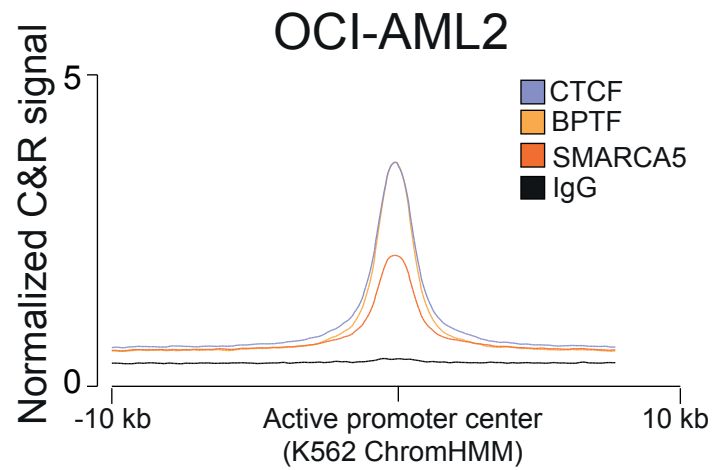

**Appendix Figure S2. BPTF and SMARCA5 bind active promoter regions in U937 and OCI-AML2 cells. A-B)** Average profiles of the CTCF, BPTF, and SMARCA5 Cut&Run signal in U937 (A) and OCI-AML2 (B) cells at the insulator regions predicted by the ChromHMM in K562 cells.

# Appendix Figure S3

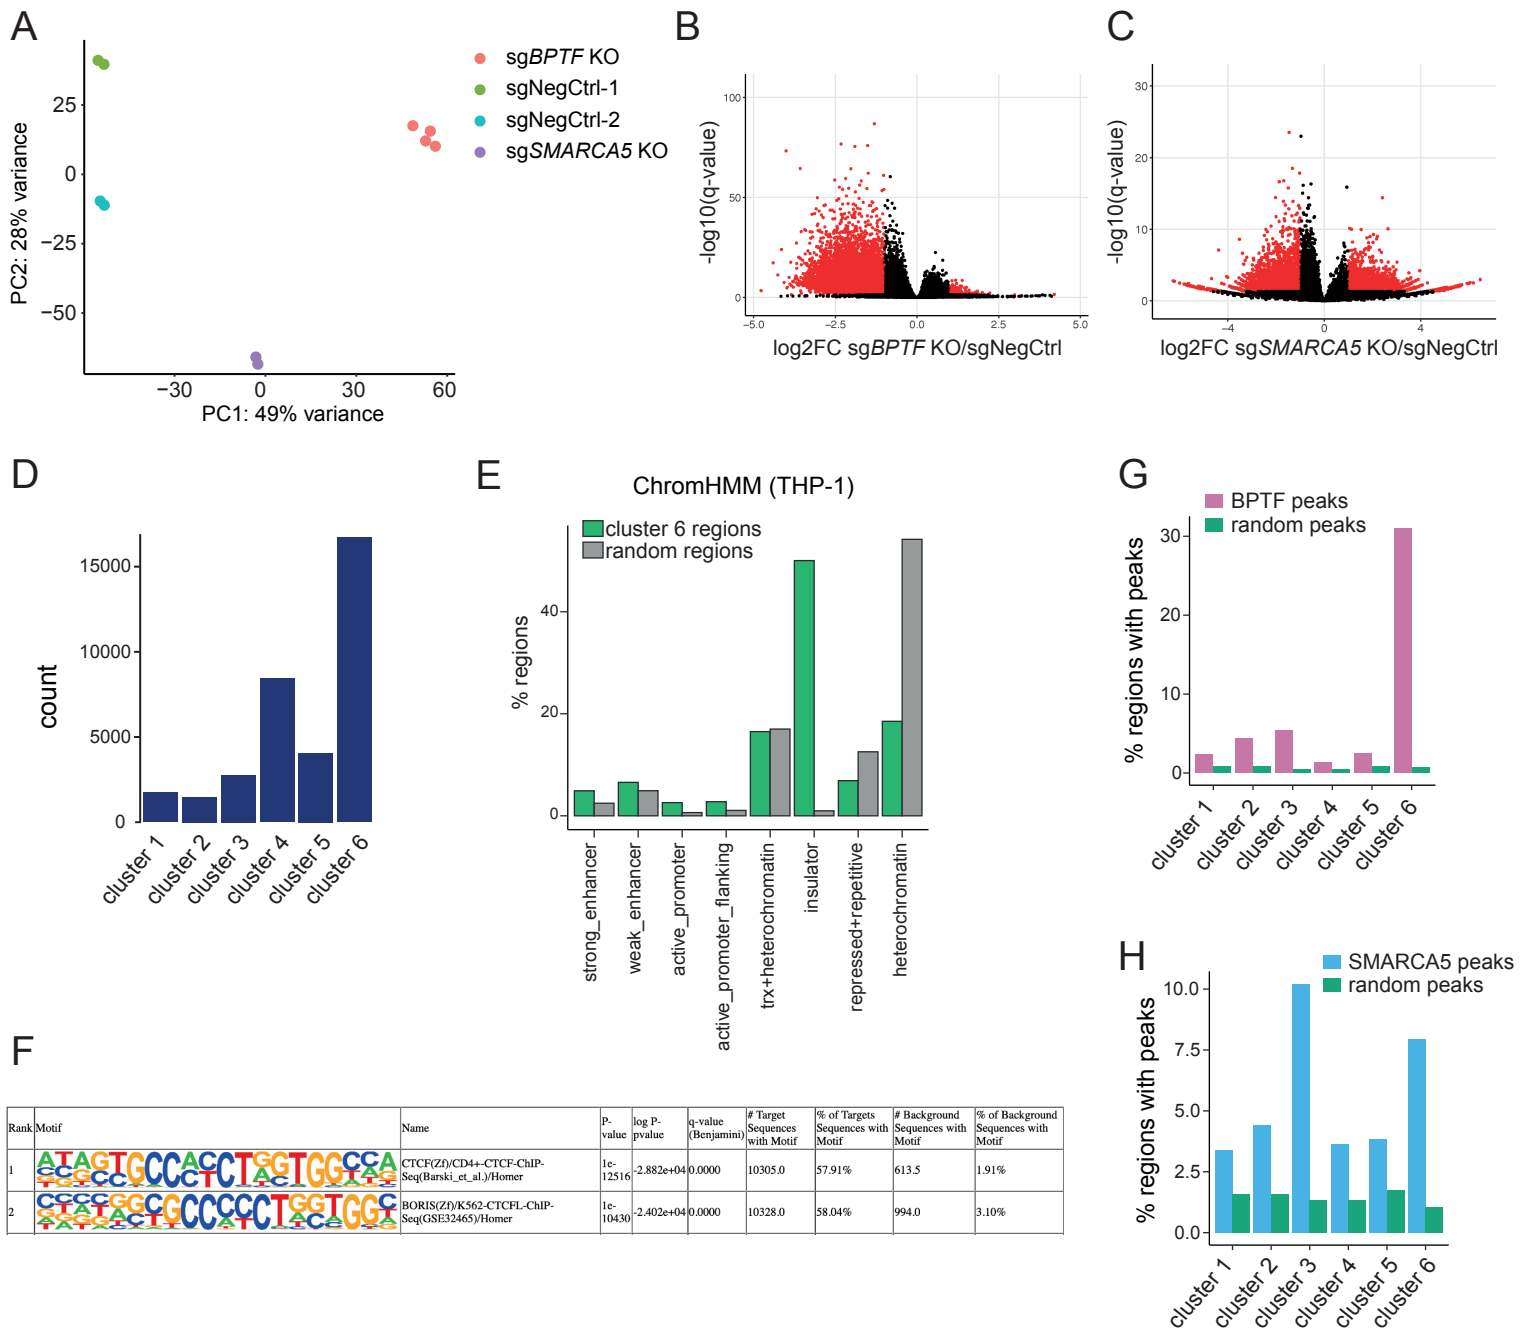

**Appendix Figure S3. BPTF and SMARCA5 together remodel insulator regions in AML cells.** A) PCA plot of the ATAC-seq samples. B-C) Volcano plots comparing ATAC-seq changes between the *BPTF* (B) or *SMARCA5* (C) KOs and wild-type cells. The peaks with an absolute log<sub>2</sub> fold change over 1 and a q-value < 0.01 are highlighted in red. D) Number of regions in the differential ATAC-seq clusters described in Figure 4F. E) Bar plot illustrating the percentage of regions in cluster 6 overlapping chromatin domain categories defined by the ChromHMM in THP1 cells. A corresponding set of random regions of the same average length and size was generated and shown in green. Some regions may overlap several categories; hence, the total percentage does not equal 100. ‘trx’ stands for transcription. F) Two top hits of the motif analysis in the differential ATAC-seq cluster 6. G-H) Bar plots illustrating the percentage of regions in differential ATAC-seq clusters overlapping with BPTF (G) or HA-SMARCA5 (H) peaks. A corresponding set of random regions of the same average lengths and sizes was generated and shown in green. All the ATAC-seq experiments were performed in two biological replicates, i.e., independent cell transductions or treatments.
